# Supplementary material for: Signaling Through the Erythropoietin Receptor Affects Angiogenesis in Retinovascular Disease
Source: PubMed Central journal article supplement (PMC7441364; doi:10.1167/iovs.61.10.23), 2020-08-12
Supplement: iovs-61-10-23_s001.pdf [file iovs-61-10-23_s001.pdf]

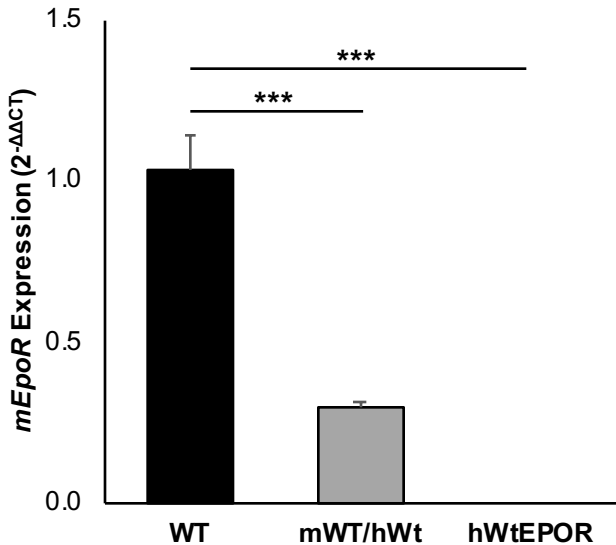

**Supplemental Figure 1. Retinal murine *EpoR* expression.**

Comparison of murine *EpoR* expression in retinas of p17 WT, heterozygous, and hWt*EPOR* mice (WT (n=8), heterozygous (n=3), hWt*EPOR* (n=3)). Results are means  $\pm$ SEM. \*\*\* =  $p < 0.001$
