# Supplementary material for: Signaling Through the Erythropoietin Receptor Affects Angiogenesis in Retinovascular Disease
Source: PubMed Central journal article supplement (PMC7441364; doi:10.1167/iovs.61.10.23), 2020-08-12
Supplement: iovs-61-10-23_s002.pdf [file iovs-61-10-23_s002.pdf]

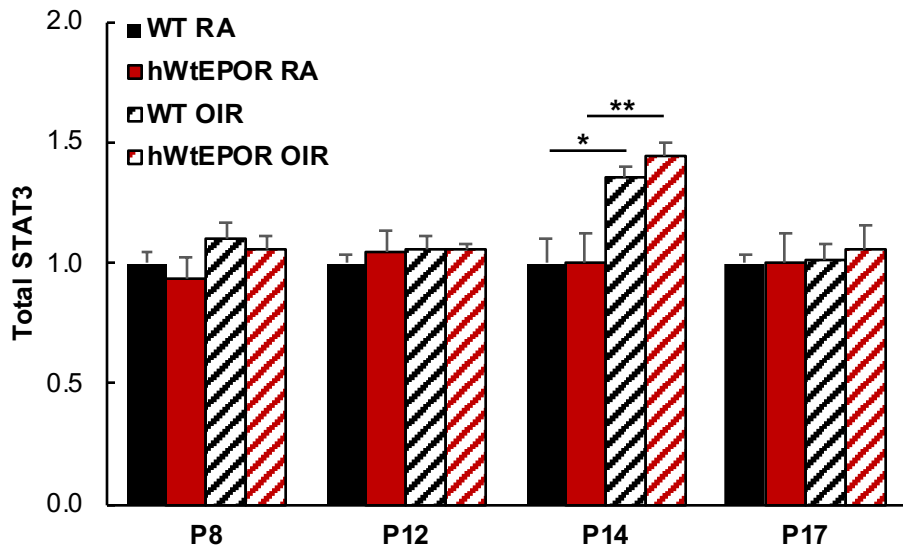

**Supplemental Figure 2. Retinal levels of total STAT3.**

Comparison of retinal total Stat3 in RA and OIR WT and hWtEPOR mice at p8, p12, p14, and p17 (p8: all groups (n=4); p12: all groups (n=3); p14: WT RA (n=6), hWtEPOR RA (n=5), WT OIR (n=4), hWtEPOR OIR (n=8); p17: WT RA (n=6), hWtEPOR RA (n=5), WT OIR (n=6), hWtEPOR OIR (n=6)). Results are means  $\pm$ SEM. \* =  $p < 0.05$  and \*\* =  $p < 0.01$
